# Supplementary material
Source: publisher site journal article supplement (https://www.dovepress.com/get_supplementary_file.php?f=377311.docx)
Supplement: Supplementary file 1 [file get_supplementary_file.php]

Table S1. Codes from DREAM database and which are treated as part of workforce and which are considered permanent detachment. Codes are from DREAM version 46.

Benefit descriptions:

“121”, “122”, “123” (payment received during holiday while currently employed); “412”, “413” (a pause in education but still part of the education); “511”, “521”, “522” (support requires employment); “651”, “652”, “661” (payment received while studying); “740”, “741”, “743”, “744”, “745”, “746”, “747”, “748”(Only available for people receiving “Flex job” benefit); “771”, “774” (benefit available to people with greatly impaired working ability who have work at greatly reduced time); “781” (only available to people with disability retirement); “881” (public support during maternity leave)

| Benefits | Part of workforce | Disability retirement |
| --- | --- | --- |
| “” = part of the workforce | x |  |
| “121” = holiday benefits | x |  |
| “122” = holiday benefits | x |  |
| “123” = holiday benefits | x |  |
| “412” = Leave of absence | x |  |
| “413” = Educational leave of absence | x |  |
| “511” = service job | x |  |
| “521” = Adult apprentice | x |  |
| “522” = Rotation substitute | x |  |
| “651” = State educational support | x |  |
| “652” = State educational support | x |  |
| “661” = Adult state educational support | x |  |
| “740” = availability benefit |  | x |
| “741” = availability benefit |  | x |
| “743” = availability benefit |  | x |
| “744” = availability benefit |  | x |
| “745” = availability benefit |  | x |
| “746” = availability benefit |  | x |
| “747” = availability benefit |  | x |
| “748” = availability benefit |  | x |
| “771” = “Flex Job” |  | x |
| “774”= “Flex Job” |  | X |
| “781” = Sheltered job |  | x |
| “783” = Early retirement |  | x |
| “881” = Maternity leave | x |  |

Table S2. Table with ICD-10 codes used to define amount of comorbidity and specific comorbidities.

| DIAGNOSIS CODES | Charlson (ICD-10) | COTE (ICD-10) | Medication (ATC-code) | GOLD (ICD-10) |
| --- | --- | --- | --- | --- |
| AMI | I21-I23, I252 |  |  |  |
| Ischemic heart disease |  | I20, I21, I23-25, |  |  |
| Cardiac insufficiency | I42 (excluding I428B), I43, I50, I099, I110, I130, I132, I255 | I42 (excluding I428B), I43, I50, I099, I110, I130, I132, I255 |  | I42 (excluding I428B), I43, I50, I099, I110, I130, I132, I255 |
| Atrial fibrillation/flutter |  | I48 |  |  |
| Peripheral vascular disease | E105, E115, E125, E135, E145, I70-I72, "I731", "I738", "I739", I74, I77, I790, I792, K551, K558, K559, Z958, Z959 |  |  |  |
| Cerebrovascular disease | I60-I69, G45, G46, H340 |  |  |  |
| Dementia | F00-F03, G30, F051, G311 |  |  |  |
| Chronic pulmonary disease (excluding COPD) | J40-J43, J45-J47, J60-J67, J84, I278, I279, J684, J701, J703, J704, J920, J953, J961, J982, J983 |  |  |  |
| Pulmonary fibrosis |  | J84, J631, J633, J635, J628A, J638A, J638B, J701, J703 |  |  |
| Bronchitis |  |  |  | J42 |
| Emphysema |  |  |  | J43, J982, J983 |
| Bronchiectasis |  |  |  | J47 |
| Rheumatic disease | M05, M06, M08, M09, M30-M36, D86 |  |  |  |
| Peptic ulcus | K25-K28, K221 | K25-K28, K221 |  |  |
| Mild liver disease | K700-K703, K713-K715, K762-K764, K73, K74, B18, K709, K717, K760, K769 |  |  |  |
| Severe liver disease | B150, B160, B162, B190, I850, I859, I864, I982, K704, K711, K721, K729, K765-K767 |  |  |  |
| Liver cirrhosis |  | K703, K717, K74, |  |  |
| Diabetes without comp | E100, E101, E109, E110, E111, E119, E120, E121, E129, E130, E131, E139, E140, E141, E149 |  | A10 |  |
| Diabetes with comp | E102-E108, E112-E118, E122-128, E132-E138, E142-E148 | E102-E108, E112-E118, E122-128, E132-E138, E142-E148 |  |  |
| Hemiplegia/paraplegia | G801, G802, G830-G834, G81-G82, G041, G114, G839 |  |  |  |
| Chronic renal failure | N032-N037, N052-N057, Z490-Z492, N18, N19, N26, I120, I131, I132, N250, Z940, Z992 |  |  |  |
| Cancer without metastasis + lymphoma + leukaemia | C00-C26, C30-C34, C37-C41, C43, C45-C58, C60-C76, C81-C85, C88, C90-C97 |  |  |  |
| Pulmonary cancer |  | C34, C398, C399 |  |  |
| Pancreatic cancer |  | C25 |  |  |
| Esophageal cancer |  | C15 |  |  |
| Mamma cancer |  | C50 |  |  |
| Cancer with metastasis | C77-C80 |  |  |  |
| AIDS/HIV | B20 – B24 |  |  |  |
| Anxiety |  | F41 | N05B |  |
| Depression |  | F32 | N06A |  |
| Gastro esophageal reflux |  |  |  | K21 |
| Sleep apnea |  |  |  | G473 |
| Osteoporosis |  |  |  | M80, M81, M82 |
| Hypertension |  |  | C02, C03, C07, C08, C09 |  |


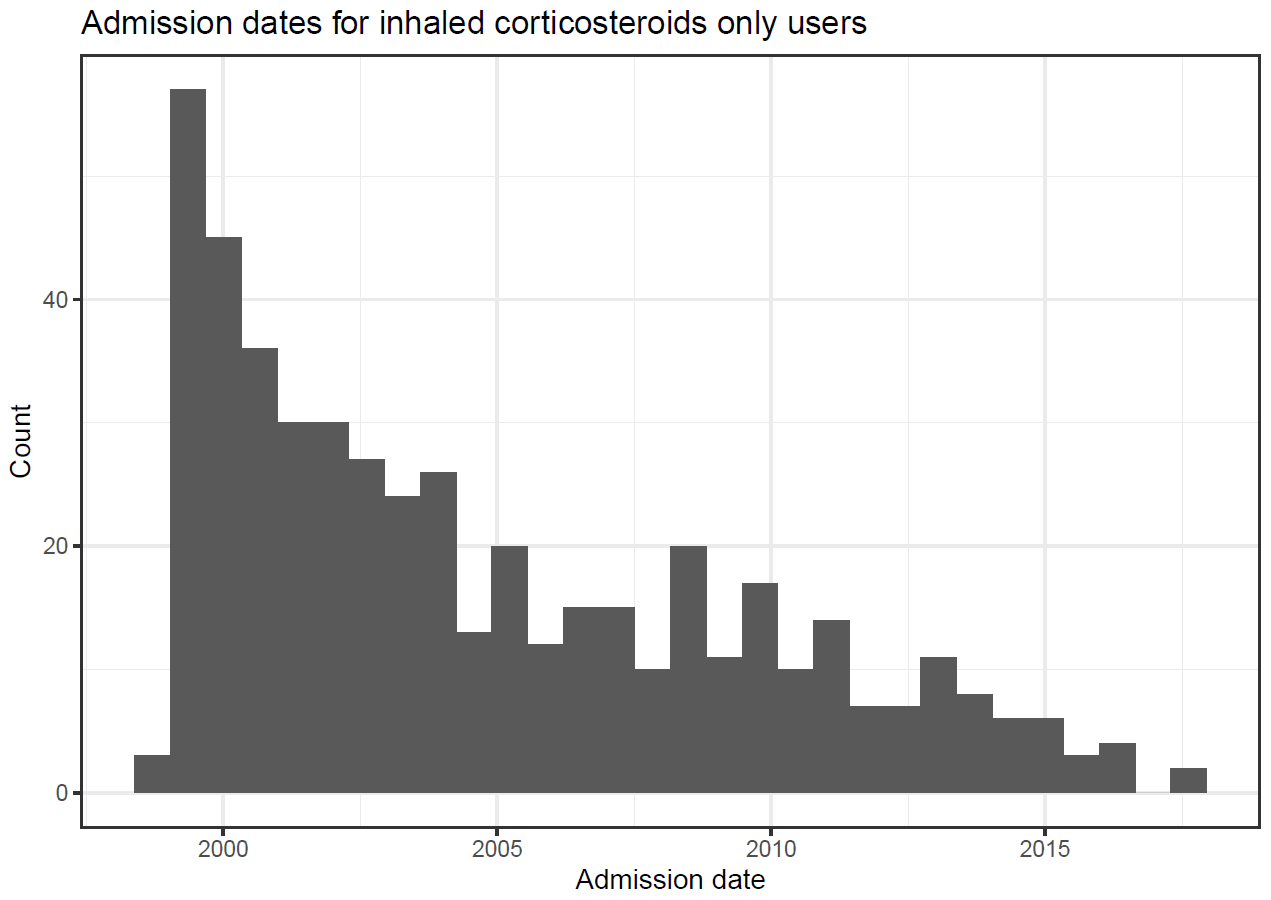


Figure S1. Date of admission for patients only using inhaled corticosteroids
